# Supplementary material for: Families Navigating Macroeconomic Hard Times: The Experiences of Portuguese Emerging Adults and Their Parents in the Aftermath of the Great Recession
Source: Springer Nature journal article supplement (doi:10.1007/s10826-023-02650-9), 2023-08-31
Supplement: MOESM1 [file 25997744]

Supplemental material

*Coding Scheme*

| <b>During the peak of the recession: Early 2010s</b>                 | F  | R  |
|----------------------------------------------------------------------|----|----|
| <b>Appraisal</b>                                                     |    |    |
| Widespread impact                                                    | 11 | 17 |
| Social comparison                                                    | 6  | 17 |
| Normalized views of crisis                                           | 4  | 6  |
| Overvalued and a scapegoat                                           | 5  | 10 |
| Positive side of the crisis                                          | 3  | 7  |
| <b>Demands and Impact</b>                                            |    |    |
| <b>Specific demands</b>                                              |    |    |
| Increase of expenses                                                 | 10 | 25 |
| Loss of income and benefits                                          | 10 | 20 |
| Events negatively impacting employment                               | 4  | 8  |
| <b>Pile-up of demands</b>                                            |    |    |
| Children's education-related expenses                                | 11 | 14 |
| Others (e.g., illness)                                               | 4  | 10 |
| <b>Experience of adversity</b>                                       |    |    |
| Difficult times                                                      | 7  | 27 |
| Times of stagnation – “lives on hold”                                | 5  | 9  |
| Times of worry and restraint                                         | 6  | 11 |
| Manageable demands, reduced impact                                   | 11 | 34 |
| “Yes, we made it”                                                    | 6  | 8  |
| <b>Intergenerational differences</b>                                 |    |    |
| Parents as shields                                                   | 8  | 21 |
| Children are the priority                                            | 6  | 8  |
| “I knew it was there, I just didn't feel its consequences that much” | 8  | 29 |
| <b>Capabilities</b>                                                  |    |    |
| <b>Coping behaviors</b>                                              |    |    |
| General adjustments                                                  | 6  | 12 |
| Defining priorities                                                  | 7  | 16 |
| New money management strategies and habits                           | 6  | 12 |
| Saving/using savings                                                 | 5  | 7  |
| Financial cutbacks                                                   | 6  | 11 |
| Social activities and entertainment                                  | 8  | 16 |
| Clothing                                                             | 5  | 7  |
| Vacations                                                            | 4  | 5  |
| Car-related expenses                                                 | 4  | 4  |
| Daily expenses                                                       | 4  | 9  |
| <b>Resources</b>                                                     |    |    |
| Positive Outlook                                                     |    |    |
| Master the possible and acceptance                                   | 7  | 9  |
| Optimistic orientation and encouragement                             | 3  | 9  |
| Perseverance                                                         | 6  | 9  |
| Cohesion                                                             | 9  | 28 |
| Flexibility                                                          | 5  | 9  |
| Social and economic resources                                        |    |    |
| Previous money management strategies                                 |    |    |
| Making a living with what we have, no extravagances                  | 10 | 27 |
| Having savings                                                       | 6  | 11 |
| Children's financial socialization                                   | 9  | 28 |
| Extended family and social support                                   | 7  | 14 |
| Material resources                                                   | 3  | 6  |
| <b>Communication</b>                                                 | 9  | 27 |
| <b>Problem-solving processes</b>                                     | 8  | 19 |

| <b>After the Storm: Late 2010s</b>                                               | F  | R  |
|----------------------------------------------------------------------------------|----|----|
| <b>Appraisal</b>                                                                 |    |    |
| Good signs and prospects vs. “buts” and persistent problems                      | 9  | 30 |
| Hidden truths, illusions and exaggerated optimism                                | 8  | 22 |
| “The economic crisis is not behind us”                                           | 12 | 37 |
| Economic crises occur cyclically                                                 | 10 | 23 |
| Extended negative effects                                                        |    |    |
| Employment                                                                       | 8  | 15 |
| How to make a living?                                                            | 6  | 18 |
| Young adults’ developmental tasks                                                | 9  | 26 |
| <b>Demands and Impact</b>                                                        |    |    |
| <b>Current and anticipated demands</b>                                           |    |    |
| Finding a job: main demand and worry for children and parents                    | 12 | 39 |
| Jobs: more demanding, less secure                                                | 9  | 25 |
| Challenges in making a living                                                    | 8  | 16 |
| Specific parental concerns                                                       |    |    |
| Capacity for continuously supporting children financially                        | 8  | 13 |
| Not being able to do more for children and being a burden for them in the future | 4  | 7  |
| Retirement pensions                                                              | 6  | 7  |
| <b>Worry, apprehension, frustration</b>                                          | 12 | 52 |
| <b>Possibilities and lack of definition</b>                                      | 12 | 31 |
| <b>Intergenerational differences – the future is for children</b>                | 11 | 30 |
| <b>Capabilities</b>                                                              |    |    |
| <b>Coping behaviors</b>                                                          | 6  | 7  |
| <b>Resources</b>                                                                 |    |    |
| Positive Outlook                                                                 |    |    |
| Acceptance and living one day at time                                            | 9  | 30 |
| Hope and positive thinking                                                       | 11 | 30 |
| Perseverance                                                                     | 10 | 40 |
| Confidence in overcoming challenges                                              | 7  | 14 |
| Cohesion                                                                         | 12 | 40 |
| Flexibility                                                                      | 11 | 22 |
| Parental support system                                                          | 11 | 50 |
| Parental co-residence                                                            | 7  | 16 |
| Social economic resources                                                        | 8  | 12 |
| Financial socialization of children                                              | 4  | 10 |
| Communication                                                                    | 8  | 22 |
| Humor                                                                            | 6  | 12 |
| Problem-solving processes                                                        |    |    |
| Planning and preparedness                                                        | 7  | 15 |
| Active mastery                                                                   | 5  | 6  |
| Shared decision-making and negotiation                                           | 3  | 4  |
| Future expectations                                                              |    |    |
| Education                                                                        | 5  | 6  |
| Work/career                                                                      | 8  | 14 |
| Marriage/family                                                                  | 6  | 11 |
| Leisure/travel                                                                   | 6  | 12 |
| Health                                                                           | 1  | 1  |
| Property                                                                         | 3  | 3  |
| Autonomy and stability                                                           | 8  | 16 |
| Financial Resources                                                              | 5  | 7  |
| <b>Spirituality</b>                                                              |    |    |
|                                                                                  | 12 | 38 |
| <b>Previous success histories</b>                                                |    |    |
|                                                                                  | 12 | 57 |

*Note.* F = number of cases/families, R = number of references.
